# Supplementary material
Source: Springer Nature journal article supplement (https://www.springermedizin.de/resource/supplementary/12943_2010_816_MOESM7_ESM.pdf/9554900)

# Figure 4.

**A.**

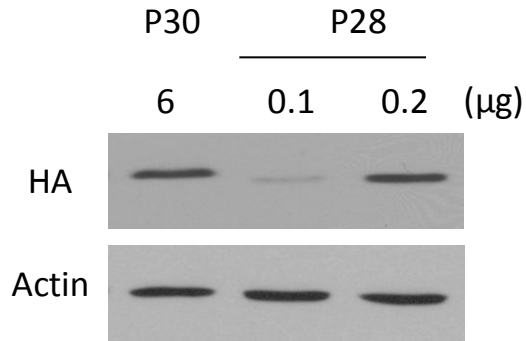

**C.**

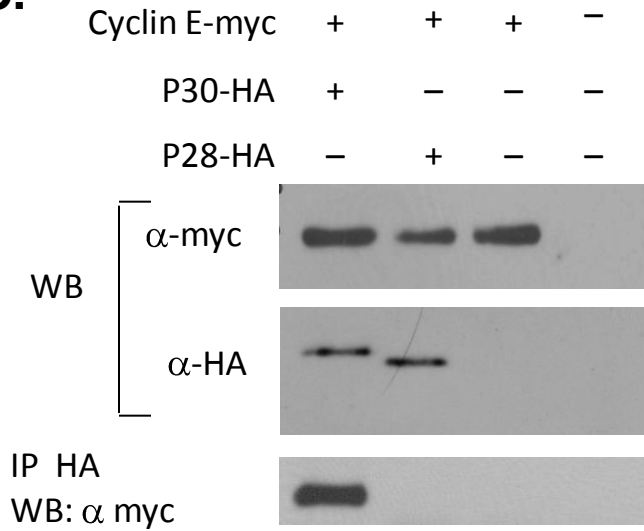

**B.**

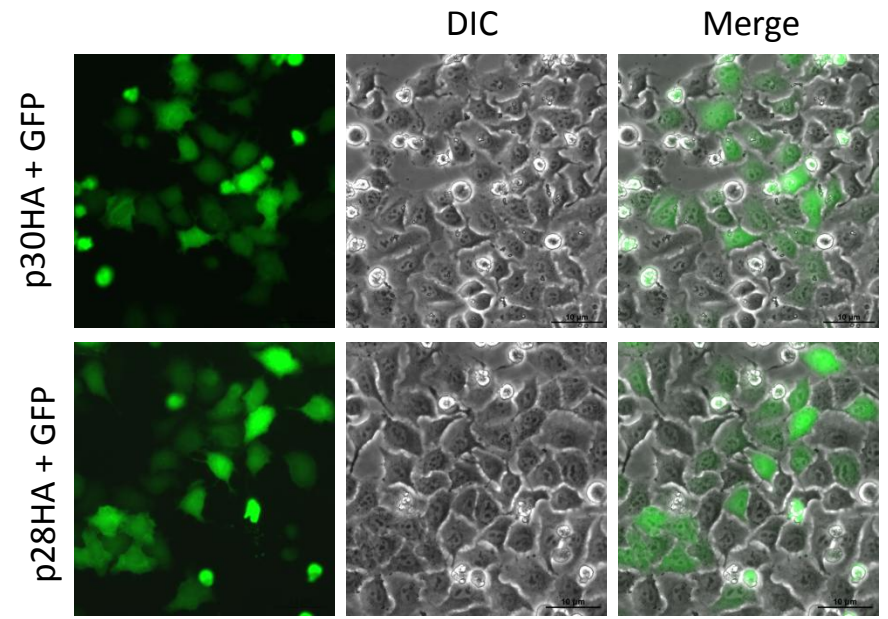

Supplement: MOESM7 [file 9554900]
